# Supplementary material for: Body Image and Other Mood Vulnerabilities in Adolescents with Polycystic Ovary Syndrome and Metabolic Alterations
Source: MDPI journal article supplement (doi:10.3390/children11050521), 2024-04-26
Supplement: s1 [file s1]

**Supplementary table S1.** Comparison of body attitude factors in adolescents with polycystic ovary syndrome according to the body mass index (BMI) and insulin resistance.

| Body attitude factors                          | BMI & Insulin resistance                | Median (95% CI) | p-Value |
|------------------------------------------------|-----------------------------------------|-----------------|---------|
| <i>Negative appreciation of body size</i>      | <b>BMI &lt;25 + HOMA &lt;2.5 (n=73)</b> | 7 (3-15)        | <0.001  |
|                                                | <b>BMI ≥25 + HOMA &lt;2.5 (n=27)</b>    | 16 (13-23)      |         |
|                                                | <b>BMI &lt;25 + HOMA ≥2.5 (n=5)</b>     | 8 (3-27)        |         |
|                                                | <b>BMI ≥25 + HOMA ≥2.5 (n=23)</b>       | 19 (15-23)      |         |
| <i>Lack of familiarity with one's own body</i> | <b>BMI &lt;25 + HOMA &lt;2.5 (n=73)</b> | 9 (7-10)        | 0.03    |
|                                                | <b>BMI ≥25 + HOMA &lt;2.5 (n=27)</b>    | 9 (7-12)        |         |
|                                                | <b>BMI &lt;25 + HOMA ≥2.5 (n=5)</b>     | 10 (5-15)       |         |
|                                                | <b>BMI ≥25 + HOMA ≥2.5 (n=23)</b>       | 12 (10-15)      |         |
| <i>General body dissatisfaction</i>            | <b>BMI &lt;25 + HOMA &lt;2.5 (n=73)</b> | 7 (4-10)        | <0.001  |
|                                                | <b>BMI ≥25 + HOMA &lt;2.5 (n=27)</b>    | 11 (9-15)       |         |
|                                                | <b>BMI &lt;25 + HOMA ≥2.5 (n=5)</b>     | 6 (3.5-16)      |         |
|                                                | <b>BMI ≥25 + HOMA ≥2.5 (n=23)</b>       | 11 (8-15)       |         |
| <i>Rest Factor</i>                             | <b>BMI &lt;25 + HOMA &lt;2.5 (n=73)</b> | 7 (5-9)         | 0.160   |
|                                                | <b>BMI ≥25 + HOMA &lt;2.5 (n=27)</b>    | 7 (4-8)         |         |
|                                                | <b>BMI &lt;25 + HOMA ≥2.5 (n=5)</b>     | 8 (4-9.5)       |         |
|                                                | <b>BMI ≥25 + HOMA ≥2.5 (n=23)</b>       | 6 (4-7)         |         |

**Abbreviations:** HOMA, homeostasis model assessment index.
